# Supplementary material for: Fabrication of a Ti-supported NiCo2O4nanosheet array and its superior catalytic performance in the hydrolysis of ammonia borane for hydrogen generation
Source: Royal Society of Chemistry journal article supplement (doi:10.1039/c5cy01542a), 2015-12-28

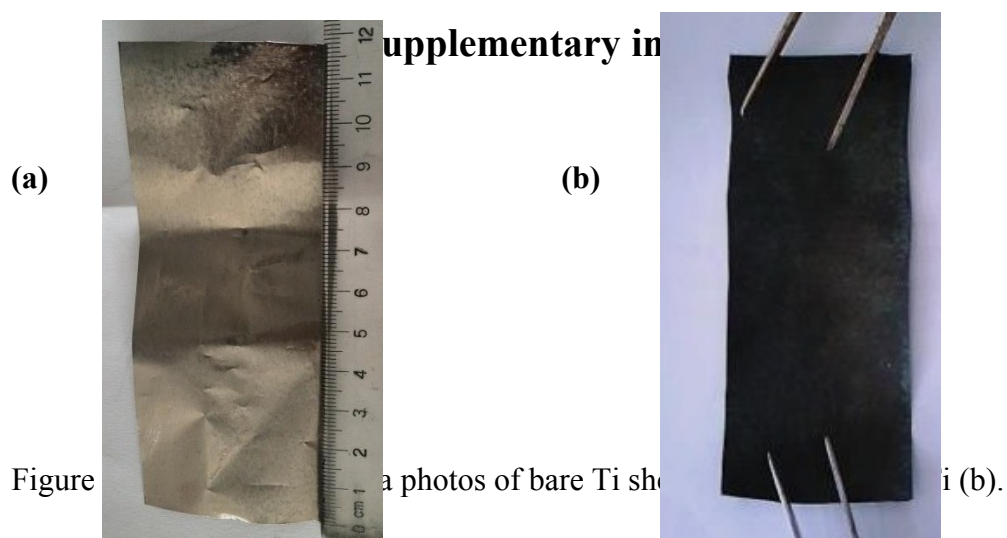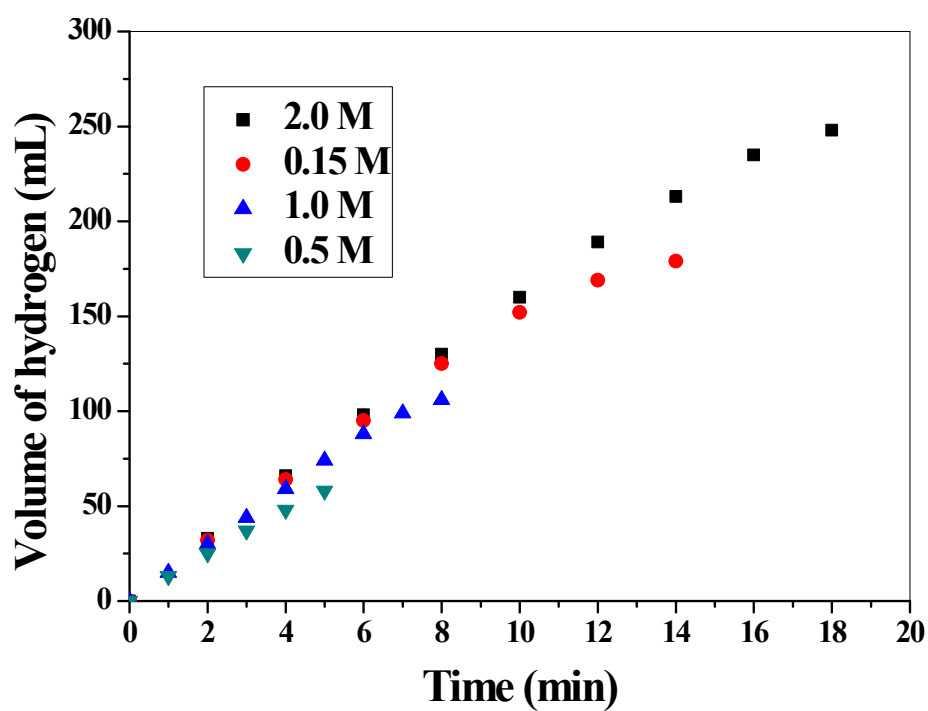

Figure S2. The accumulated volume of generated hydrogen vs. reaction time at different initial concentration of AB.

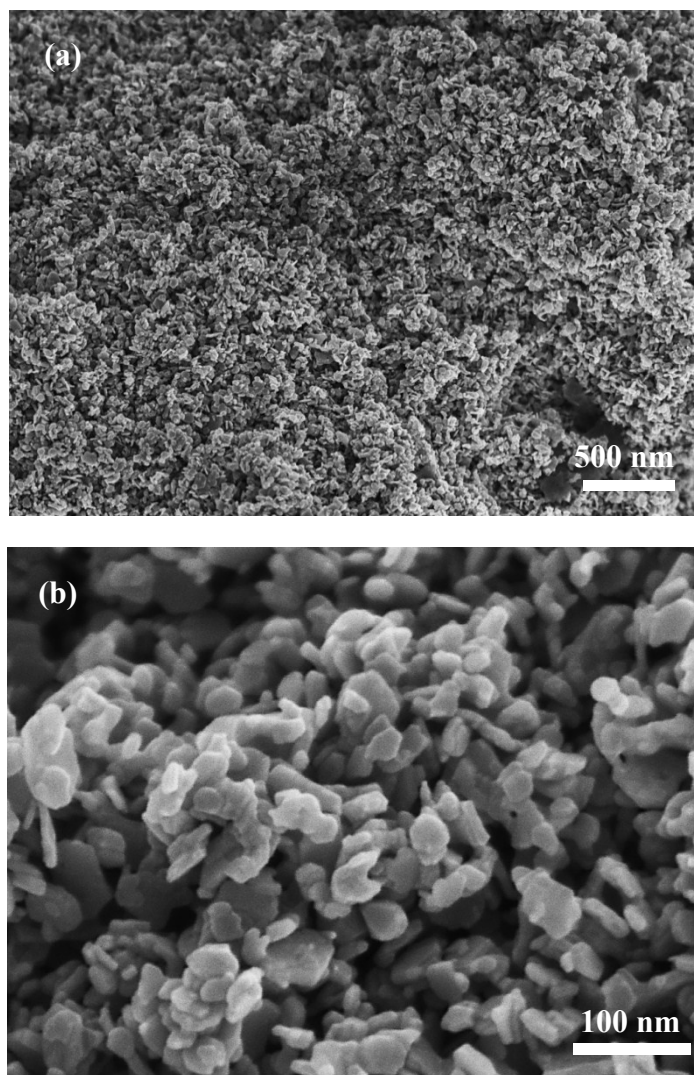

Figure S3. SEM images of  $\text{NiCo}_2\text{O}_4$  nanoparticles at different magnifications.

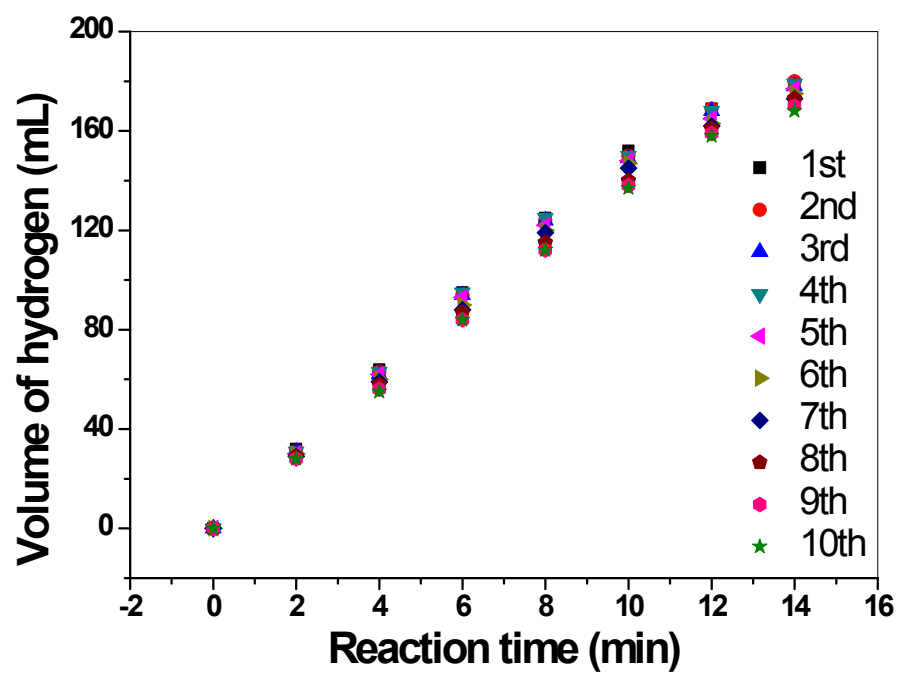

Figure S4. The accumulated volume of generated hydrogen vs. reaction time at different cycles

### Peeling test

The peeling test was performed on a WD-D3 Electronic Tensile Testing Machine, which was purchased from Shenzhen Hengzecheng Apparatus Co. Ltd., China. In a typical testing process, the film was fixed on the stainless steel plate, and a scotch tape was bonded with the film. Then, the scotch tape migrates at a rate of  $20 \text{ mm min}^{-1}$  in order to detach the  $\text{NiCo}_2\text{O}_4$  layer from Ti substrate. After test, it was found that no  $\text{NiCo}_2\text{O}_4$  peel off from the Ti substrate.

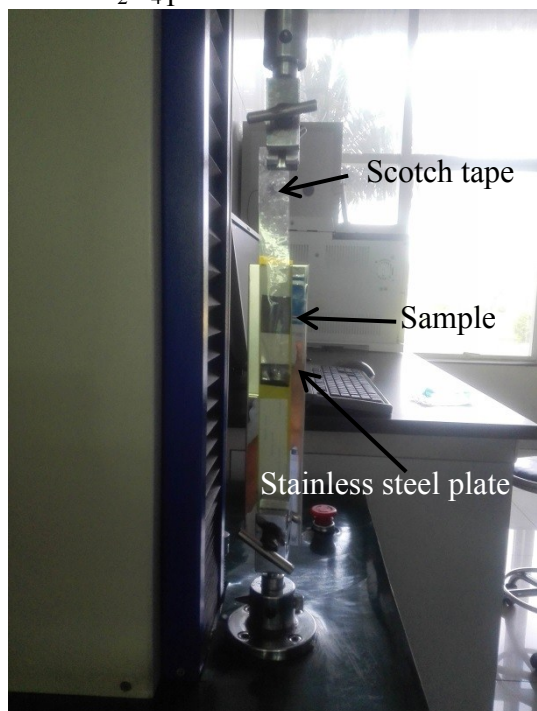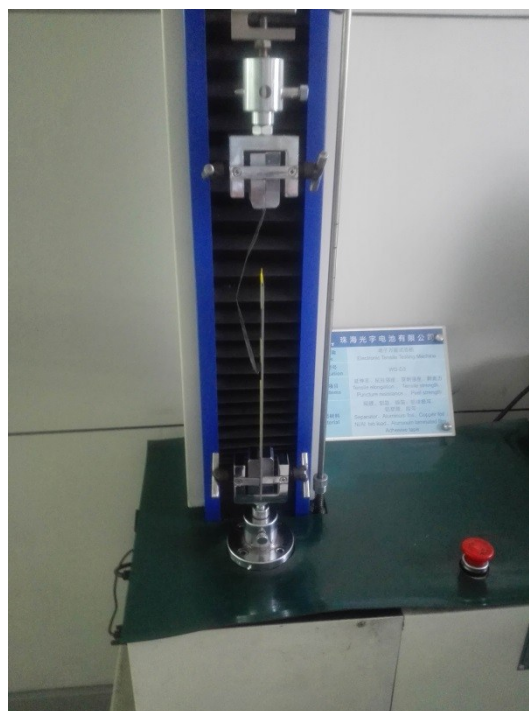

Supplement: c5cy01542a1.pdf [file c5cy01542a1.pdf]
